# Supplementary material
Source: PubMed Central journal article supplement (PMC3421653)
Supplement: JVI.00771-12_zjv999096278so1.pdf [file JVI.00771-12_zjv999096278so1.pdf]

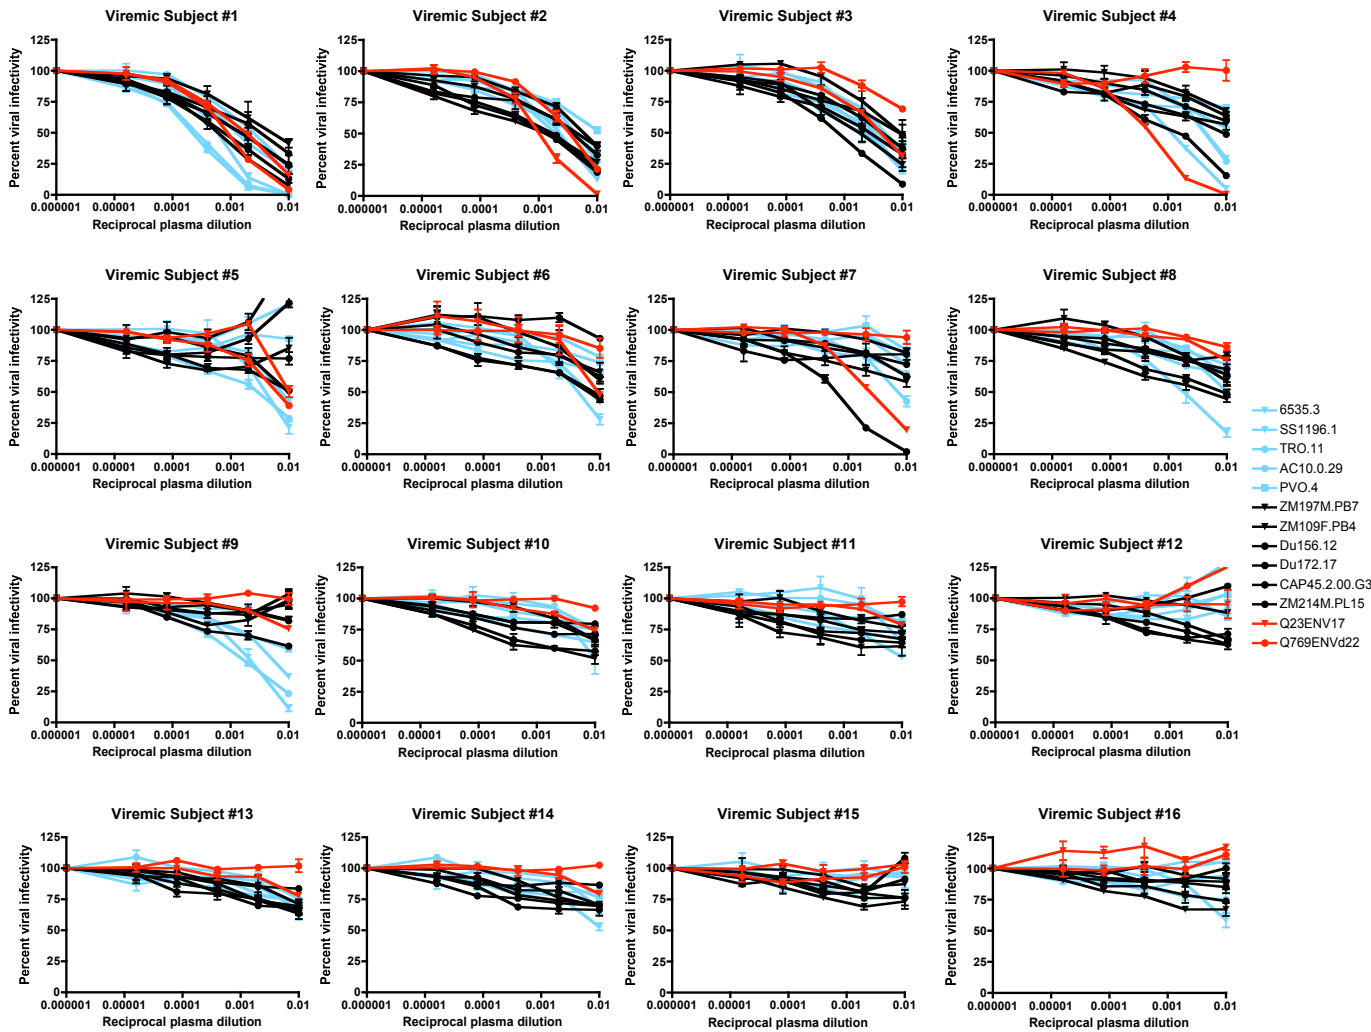

**Supplementary Figure 1. Heterologous neutralization breadth of plasma from 16 viremic HIV-1 subjects.** Plasma from 16 viremic subjects was evaluated for cross-neutralizing capacity against virions pseudotyped with 13 heterologous HIV-1 envelopes (Envs) from three clades (subtype B Envs = light blue, subtype C Envs = black, subtype A Envs = red). Pseudoviruses were produced through co-transfection of each heterologous Env with the subtype B HIV-1 *env*-deficient provirus, SG3ΔEnv. Subsequent viral infectivity, measured by production of luciferase, was assayed in Tzm-bl cells in the presence or absence of serially-diluted plasma. Percent viral infectivity, as adjusted against wells containing no test plasma, is depicted on the vertical axis; reciprocal plasma dilutions are plotted along the horizontal axis in a logarithmic fashion. Each graph illustrates the heterologous neutralization breadth of one viremic subject, where every curve represents a single Env-plasma combination, and error bars demonstrate the standard error of the mean of two independent experiments using duplicate wells: closed inverted triangles = tier 1B Envs, closed circles = tier 2 Envs, closed squares = tier 3 Envs, as defined by (45).
